# Supplementary material
Source: Research Square preprint supplement (doi:10.21203/rs.3.rs-9603458/v1)
Supplement: Supplementary file 1 [file 006cc6b051fbbd3e4b2082e0.docx]

**Title:** **Trends and Drivers of HIV/AIDS Incidence and Mortality in Mainland China (2004–2020): A Spatiotemporal and Socioeconomic Analysis**

Yunqiang Fu1,Yuekun Wu1,Zehao Sun2,Ting Chen2*

1 School of Resources and Environmental Engineering, Wuhan University of Science and Technology, No. 947, Heping Avenue, Qingshan District,Wuhan 430081, China.

2 School of Public Health,Wuhan University of Science and Technology, Healthy Hubei Development and Social Progress Research Center of the Key Research Base of Humanities and Social Sciences in Hubei Province, 2 Huangjiahuxi Road, Hongshan District, Wuhan 430065, China.

Yunqiang Fu and Yuekun Wu are co-first authors of the article

*Correspondence:

Ting Chen

Email: [chent41@wust.edu.cn](mailto:chent41@wust.edu.cn)

Telephone:+86 181 2023 7582

|  | **Males** | | | |  | **Females** | | | |  | **Overall** | | | | | |
| --- | --- | --- | --- | --- | --- | --- | --- | --- | --- | --- | --- | --- | --- | --- | --- | --- |
| **Year** | **Number of incidence cases** | **ASIR**  **(1/105)** | **Number of deaths** | **ASMR**  **(1/105)** |  | **Number of incidence cases** | **ASIR**  **(1/105)** | **Number of deaths** | **ASMR**  **(1/105)** |  | **Number of incidence cases** | **ASIR**  **(1/105)** | | **Number of deaths** | **ASMR(1/105)** |
|  |
| 2004 | 2,009 | 0.31 | 513 | 0.08 |  | 1,045 | 0.18 | 228 | 0.04 |  | 3,054 | 0.25 | 741 | | 0.06 |
| 2005 | 3,634 | 0.55 | 885 | 0.14 |  | 1,987 | 0.32 | 431 | 0.07 |  | 5,621 | 0.44 | 1,316 | | 0.10 |
| 2006 | 4,308 | 0.67 | 877 | 0.14 |  | 2,363 | 0.38 | 454 | 0.07 |  | 6,671 | 0.52 | 1,331 | | 0.10 |
| 2007 | 6,289 | 0.96 | 2,648 | 0.38 |  | 3,438 | 0.56 | 1,256 | 0.19 |  | 9,727 | 0.76 | 3,904 | | 0.29 |
| 2008 | 6,716 | 1.03 | 3,724 | 0.55 |  | 3,343 | 0.54 | 1,665 | 0.25 |  | 10,059 | 0.79 | 5,389 | | 0.40 |
| 2009 | 9,095 | 1.40 | 4,742 | 0.72 |  | 4,186 | 0.67 | 1,854 | 0.28 |  | 13,281 | 1.03 | 6,596 | | 0.50 |
| 2010 | 11,320 | 1.72 | 5,855 | 0.88 |  | 4,662 | 0.73 | 1,888 | 0.29 |  | 15,982 | 1.23 | 7,743 | | 0.59 |
| 2011 | 14,909 | 2.21 | 6,916 | 1.02 |  | 5,541 | 0.85 | 2,308 | 0.35 |  | 20,450 | 1.54 | 9,224 | | 0.68 |
| 2012 | 30,434 | 4.46 | 8,872 | 1.29 |  | 11,495 | 1.74 | 2,703 | 0.40 |  | 41,929 | 3.12 | 11,575 | | 0.85 |
| 2013 | 31,638 | 4.61 | 9,003 | 1.31 |  | 10,648 | 1.60 | 2,434 | 0.36 |  | 42,286 | 3.13 | 11,437 | | 0.84 |
| 2014 | 34,539 | 5.03 | 9,415 | 1.36 |  | 10,606 | 1.60 | 2,615 | 0.38 |  | 45,145 | 3.34 | 12,030 | | 0.88 |
| 2015 | 39,005 | 5.64 | 10,116 | 1.46 |  | 11,325 | 1.68 | 2,639 | 0.39 |  | 50,330 | 3.69 | 12,755 | | 0.93 |
| 2016 | 42,431 | 6.08 | 11,167 | 1.58 |  | 11,929 | 1.77 | 2,924 | 0.43 |  | 54,360 | 3.96 | 14,091 | | 1.01 |
| 2017 | 44,612 | 6.34 | 12,163 | 1.71 |  | 12,582 | 1.84 | 3,088 | 0.45 |  | 57,194 | 4.12 | 15,251 | | 1.08 |
| 2018 | 49,974 | 7.05 | 14,875 | 2.06 |  | 14,196 | 2.06 | 3,905 | 0.56 |  | 64,170 | 4.58 | 18,780 | | 1.31 |
| 2019 | 55,511 | 7.54 | 16,848 | 2.23 |  | 15,693 | 2.13 | 4,151 | 0.57 |  | 71,204 | 4.86 | 20,999 | | 1.40 |
| 2020 | 48,763 | 6.55 | 15,106 | 1.96 |  | 13,404 | 1.77 | 3,713 | 0.49 |  | 62,167 | 4.18 | 18,819 | | 1.22 |

**Supplementary Table 1.** Sex-specific incidence and mortality of AIDS among Chinese residents, 2004–2020, ASIR : age-standardized incidence rate ; ASMR : age-standardized mortality rate

**
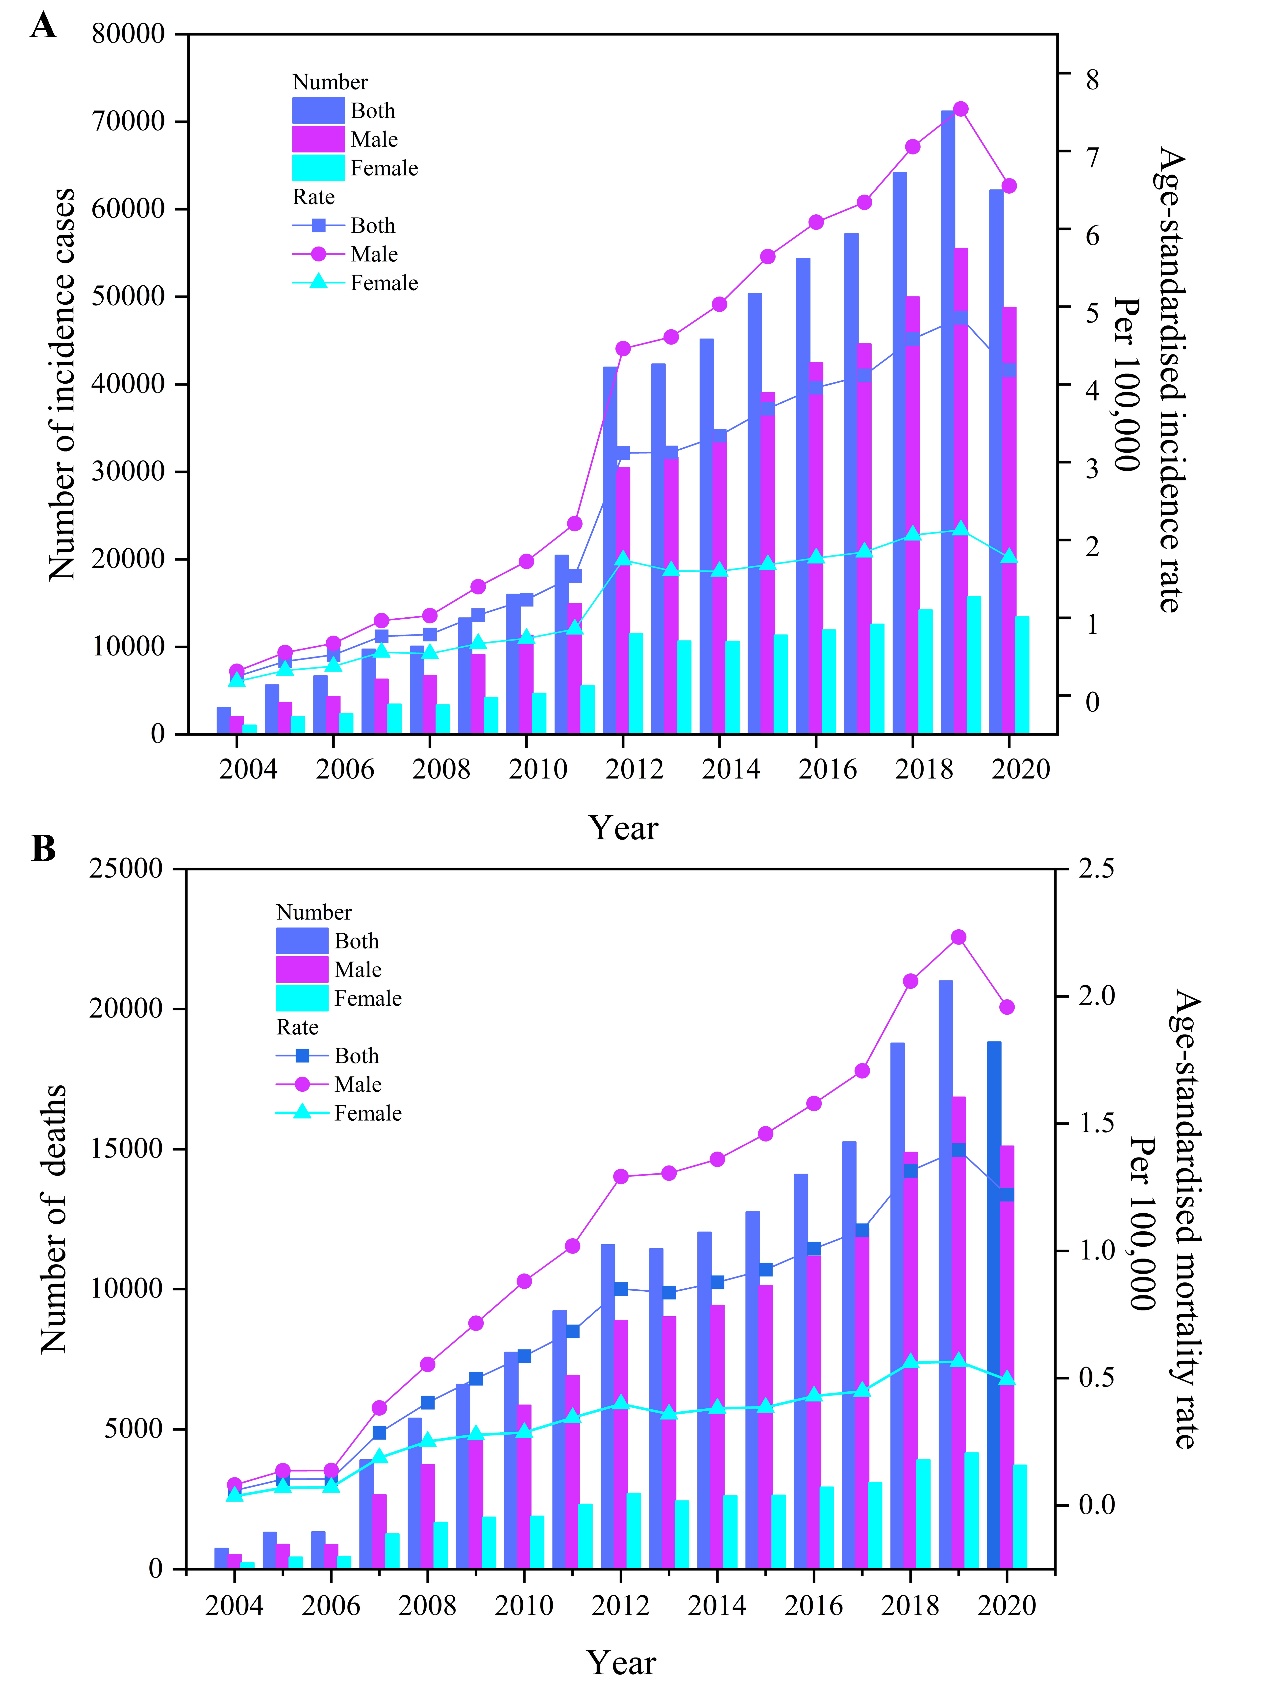
Supplementary Fig. 1**. Incidence**(A)** and mortality**(B)** in various provinces (autonomous regions and municipalities directly under the Central Government) of mainland China from 2004 -2020.

| **Regions** | **2004** | **2005** | **2006** | **2007** | **2008** | **2009** | **2010** | **2011** | **2012** | **2013** | **2014** | **2015** | **2016** | **2017** | **2018** | **2019** | **2020** |
| --- | --- | --- | --- | --- | --- | --- | --- | --- | --- | --- | --- | --- | --- | --- | --- | --- | --- |
| Heilongjiang | 0.04 | 0.06 | 0.09 | 0.09 | 0.17 | 0.17 | 0.29 | 0.41 | 0.68 | 0.98 | 1.26 | 1.44 | 1.48 | 1.62 | 1.84 | 1.96 | 1.47 |
| Jilin | 0.06 | 0.08 | 0.08 | 0.15 | 0.17 | 0.26 | 0.36 | 0.67 | 0.92 | 1.25 | 1.59 | 1.96 | 1.99 | 2.03 | 2.17 | 2.28 | 1.94 |
| Liaoning | 0.04 | 0.06 | 0.06 | 0.12 | 0.12 | 0.17 | 0.25 | 0.42 | 1.02 | 1.31 | 1.49 | 1.88 | 2.31 | 2.51 | 2.89 | 2.70 | 2.24 |
| Shandong | 0.03 | 0.06 | 0.04 | 0.04 | 0.04 | 0.11 | 0.11 | 0.13 | 0.30 | 0.36 | 0.47 | 0.62 | 0.74 | 0.85 | 0.96 | 1.04 | 1.02 |
| Jiangsu | 0.05 | 0.11 | 0.12 | 0.16 | 0.18 | 0.27 | 0.42 | 0.59 | 1.24 | 1.48 | 1.65 | 1.98 | 2.02 | 1.65 | 1.93 | 2.07 | 1.60 |
| Shanghai | 0.19 | 0.16 | 0.29 | 0.45 | 0.71 | 0.83 | 1.43 | 1.55 | 2.78 | 2.31 | 1.88 | 2.15 | 2.27 | 2.13 | 2.13 | 2.21 | 1.66 |
| Zhejiang | 0.06 | 0.09 | 0.14 | 0.24 | 0.31 | 0.48 | 0.88 | 0.94 | 1.79 | 2.28 | 2.74 | 3.02 | 3.37 | 3.24 | 3.14 | 3.30 | 2.81 |
| Fujian | 0.14 | 0.14 | 0.18 | 0.25 | 0.33 | 0.50 | 0.65 | 0.71 | 1.23 | 1.10 | 1.65 | 2.00 | 2.43 | 2.50 | 2.68 | 2.96 | 2.76 |
| Guangdong | 0.26 | 0.41 | 0.57 | 0.81 | 1.01 | 1.30 | 1.20 | 1.41 | 2.94 | 2.89 | 3.29 | 3.65 | 3.80 | 3.92 | 4.03 | 4.01 | 3.44 |
| Guangxi | 0.70 | 1.98 | 2.67 | 5.17 | 5.00 | 7.31 | 8.41 | 10.88 | 18.15 | 15.04 | 14.02 | 13.25 | 12.48 | 12.63 | 12.32 | 14.28 | 14.06 |
| Hainan | 0.05 | 0.05 | 0.18 | 0.39 | 0.26 | 0.39 | 0.36 | 0.68 | 1.48 | 1.70 | 1.14 | 2.10 | 1.92 | 1.84 | 2.24 | 2.17 | 2.26 |
| Yunnan | 0.68 | 0.72 | 1.86 | 3.26 | 3.77 | 4.49 | 4.81 | 5.92 | 13.63 | 12.47 | 12.34 | 12.31 | 12.04 | 11.89 | 11.52 | 11.79 | 12.51 |
| Guizhou | 0.01 | 0.12 | 0.05 | 0.31 | 0.46 | 0.63 | 0.80 | 1.36 | 4.02 | 4.43 | 4.87 | 6.02 | 7.42 | 8.57 | 10.32 | 13.20 | 11.49 |
| Chongqing | 0.11 | 0.16 | 0.16 | 0.34 | 0.65 | 1.06 | 1.49 | 2.54 | 5.54 | 6.16 | 8.39 | 8.76 | 10.20 | 9.73 | 11.60 | 12.58 | 11.47 |
| Sichuan | 0.06 | 0.12 | 0.16 | 0.50 | 0.67 | 1.06 | 1.94 | 2.68 | 6.09 | 7.39 | 8.02 | 9.55 | 11.16 | 13.04 | 17.47 | 21.42 | 16.54 |
| Tibet | 0.00 | 0.07 | 0.11 | 0.04 | 0.18 | 0.10 | 0.14 | 0.17 | 0.69 | 0.29 | 0.67 | 1.04 | 1.57 | 0.85 | 1.54 | 0.90 | 1.34 |
| Qinghai | 0.13 | 0.13 | 0.18 | 0.13 | 0.16 | 0.20 | 0.39 | 0.53 | 1.36 | 1.62 | 1.85 | 2.59 | 2.97 | 3.29 | 2.59 | 3.32 | 2.42 |
| Xinjiang | 0.10 | 0.52 | 1.33 | 1.23 | 1.04 | 1.91 | 2.50 | 3.18 | 11.09 | 8.02 | 7.12 | 8.13 | 8.14 | 8.35 | 10.10 | 9.50 | 5.96 |
| Gansu | 0.04 | 0.10 | 0.02 | 0.13 | 0.08 | 0.15 | 0.21 | 0.25 | 0.55 | 0.68 | 0.88 | 1.20 | 1.55 | 1.84 | 2.35 | 2.29 | 2.04 |
| Ningxia | 0.00 | 0.07 | 0.03 | 0.12 | 0.10 | 0.17 | 0.30 | 0.19 | 0.75 | 0.91 | 0.87 | 1.18 | 1.26 | 1.50 | 1.69 | 2.12 | 1.55 |
| Shaanxi | 0.05 | 0.06 | 0.10 | 0.14 | 0.13 | 0.22 | 0.34 | 0.45 | 0.91 | 1.33 | 1.41 | 1.74 | 2.13 | 2.33 | 2.66 | 2.86 | 2.45 |
| Inner Mongolia | 0.03 | 0.03 | 0.07 | 0.06 | 0.05 | 0.05 | 0.12 | 0.13 | 0.28 | 0.54 | 0.81 | 0.83 | 1.14 | 1.23 | 1.36 | 1.37 | 1.17 |
| Hebei | 0.04 | 0.09 | 0.07 | 0.11 | 0.13 | 0.11 | 0.17 | 0.21 | 0.38 | 0.57 | 0.70 | 0.92 | 0.79 | 1.01 | 1.16 | 1.31 | 1.45 |
| Tianjin | 0.00 | 0.13 | 0.19 | 0.23 | 0.26 | 0.33 | 0.47 | 0.88 | 1.15 | 1.37 | 1.58 | 1.79 | 1.79 | 1.80 | 1.84 | 1.58 | 1.73 |
| Beijing | 0.48 | 0.49 | 0.33 | 0.45 | 0.33 | 0.60 | 1.00 | 1.18 | 2.75 | 2.95 | 3.33 | 3.61 | 3.62 | 3.43 | 3.91 | 3.17 | 1.89 |
| Shanxi | 0.11 | 0.35 | 0.31 | 0.36 | 0.29 | 0.30 | 0.47 | 0.55 | 0.70 | 0.86 | 1.18 | 1.35 | 1.45 | 1.73 | 1.49 | 1.65 | 1.54 |
| Henan | 1.36 | 2.47 | 2.28 | 2.44 | 1.91 | 1.96 | 1.58 | 1.86 | 3.40 | 3.03 | 3.05 | 3.26 | 3.17 | 3.14 | 3.03 | 3.43 | 2.99 |
| Anhui | 0.01 | 0.44 | 0.23 | 0.32 | 0.31 | 0.37 | 0.54 | 0.76 | 1.37 | 1.40 | 1.43 | 1.71 | 2.17 | 1.85 | 2.06 | 2.00 | 1.72 |
| Hubei | 0.41 | 0.41 | 0.42 | 0.42 | 0.47 | 0.51 | 0.62 | 0.78 | 1.48 | 1.77 | 1.89 | 2.02 | 2.18 | 2.38 | 2.50 | 2.61 | 2.30 |
| Hunan | 0.14 | 0.28 | 0.48 | 0.53 | 0.64 | 0.85 | 1.16 | 1.41 | 2.92 | 3.16 | 3.40 | 3.82 | 4.15 | 4.42 | 4.52 | 4.61 | 4.09 |
| Jiangxi | 0.08 | 0.14 | 0.18 | 0.24 | 0.26 | 0.36 | 0.53 | 0.71 | 1.27 | 1.68 | 1.73 | 2.60 | 3.01 | 3.12 | 3.55 | 3.77 | 3.67 |

**Supplementary Table 2**. AIDS incidence in 31 provinces of Chinese mainland, 2004–2020(1/105)

| **Regions** | **2004** | **2005** | **2006** | **2007** | **2008** | **2009** | **2010** | **2011** | **2012** | **2013** | **2014** | **2015** | **2016** | **2017** | **2018** | **2019** | **2020** |
| --- | --- | --- | --- | --- | --- | --- | --- | --- | --- | --- | --- | --- | --- | --- | --- | --- | --- |
| Heilongjiang | 0.01 | 0.02 | 0.03 | 0.05 | 0.06 | 0.07 | 0.10 | 0.16 | 0.17 | 0.20 | 0.18 | 0.19 | 0.23 | 0.28 | 0.36 | 0.38 | 0.34 |
| Jilin | 0.03 | 0.03 | 0.04 | 0.07 | 0.12 | 0.10 | 0.17 | 0.20 | 0.22 | 0.35 | 0.44 | 0.54 | 0.46 | 0.46 | 0.47 | 0.48 | 0.42 |
| Liaoning | 0.02 | 0.02 | 0.02 | 0.05 | 0.07 | 0.06 | 0.09 | 0.14 | 0.15 | 0.23 | 0.28 | 0.30 | 0.29 | 0.28 | 0.42 | 0.51 | 0.36 |
| Shandong | 0.02 | 0.03 | 0.03 | 0.02 | 0.03 | 0.05 | 0.06 | 0.05 | 0.06 | 0.07 | 0.09 | 0.11 | 0.12 | 0.11 | 0.11 | 0.15 | 0.16 |
| Jiangsu | 0.03 | 0.05 | 0.04 | 0.07 | 0.09 | 0.09 | 0.11 | 0.16 | 0.21 | 0.27 | 0.29 | 0.23 | 0.28 | 0.25 | 0.33 | 0.31 | 0.29 |
| Shanghai | 0.03 | 0.03 | 0.05 | 0.07 | 0.13 | 0.11 | 0.14 | 0.13 | 0.16 | 0.16 | 0.14 | 0.15 | 0.21 | 0.18 | 0.18 | 0.21 | 0.30 |
| Zhejiang | 0.02 | 0.03 | 0.03 | 0.06 | 0.12 | 0.13 | 0.18 | 0.22 | 0.21 | 0.28 | 0.33 | 0.33 | 0.44 | 0.45 | 0.46 | 0.51 | 0.48 |
| Fujian | 0.06 | 0.07 | 0.06 | 0.08 | 0.12 | 0.22 | 0.25 | 0.31 | 0.29 | 0.21 | 0.23 | 0.24 | 0.29 | 0.35 | 0.57 | 0.51 | 0.50 |
| Guangdong | 0.06 | 0.07 | 0.12 | 0.22 | 0.34 | 0.45 | 0.51 | 0.60 | 0.70 | 0.67 | 0.72 | 0.73 | 0.82 | 0.78 | 0.87 | 0.90 | 0.87 |
| Guangxi | 0.11 | 0.20 | 0.18 | 0.66 | 1.23 | 2.27 | 3.09 | 4.35 | 6.46 | 5.92 | 5.55 | 5.59 | 5.57 | 5.26 | 6.29 | 7.81 | 7.13 |
| Hainan | 0.01 | 0.01 | 0.02 | 0.20 | 0.19 | 0.33 | 0.38 | 0.53 | 0.56 | 0.56 | 0.63 | 0.53 | 0.64 | 0.58 | 0.54 | 0.62 | 0.60 |
| Yunnan | 0.24 | 0.18 | 0.26 | 1.19 | 1.69 | 2.10 | 2.37 | 2.74 | 3.40 | 3.60 | 3.66 | 3.88 | 3.99 | 4.83 | 4.61 | 4.62 | 3.84 |
| Guizhou | 0.01 | 0.06 | 0.01 | 0.12 | 0.27 | 0.49 | 0.59 | 0.85 | 0.98 | 1.15 | 1.15 | 1.45 | 1.73 | 2.45 | 2.73 | 4.53 | 3.94 |
| Chongqing | 0.04 | 0.05 | 0.06 | 0.12 | 0.34 | 0.55 | 0.67 | 1.00 | 1.36 | 1.36 | 1.45 | 1.56 | 2.08 | 2.26 | 3.14 | 4.10 | 3.67 |
| Sichuan | 0.03 | 0.04 | 0.06 | 0.26 | 0.39 | 0.53 | 0.97 | 1.26 | 1.53 | 1.64 | 1.83 | 2.07 | 2.47 | 2.89 | 4.71 | 4.71 | 4.07 |
| Tibet | 0.00 | 0.00 | 0.04 | 0.00 | 0.11 | 0.03 | 0.03 | 0.03 | 0.13 | 0.06 | 0.13 | 0.16 | 0.12 | 0.09 | 0.12 | 0.20 | 0.20 |
| Qinghai | 0.13 | 0.00 | 0.07 | 0.05 | 0.07 | 0.04 | 0.13 | 0.04 | 0.28 | 0.28 | 0.40 | 0.39 | 0.49 | 0.51 | 0.50 | 0.71 | 0.76 |
| Xinjiang | 0.03 | 0.03 | 0.06 | 0.19 | 0.72 | 1.20 | 1.65 | 2.05 | 2.34 | 2.62 | 2.42 | 2.96 | 2.83 | 2.84 | 3.74 | 4.32 | 2.43 |
| Gansu | 0.04 | 0.02 | 0.02 | 0.07 | 0.06 | 0.07 | 0.06 | 0.11 | 0.15 | 0.17 | 0.15 | 0.22 | 0.24 | 0.31 | 0.39 | 0.50 | 0.50 |
| Ningxia | 0.00 | 0.02 | 0.03 | 0.02 | 0.10 | 0.08 | 0.13 | 0.13 | 0.20 | 0.20 | 0.24 | 0.21 | 0.18 | 0.33 | 0.32 | 0.38 | 0.43 |
| Shaanxi | 0.02 | 0.01 | 0.03 | 0.06 | 0.08 | 0.11 | 0.16 | 0.13 | 0.22 | 0.21 | 0.20 | 0.30 | 0.35 | 0.39 | 0.43 | 0.52 | 0.50 |
| Inner Mongolia | 0.01 | 0.01 | 0.03 | 0.03 | 0.02 | 0.07 | 0.06 | 0.05 | 0.04 | 0.09 | 0.13 | 0.15 | 0.15 | 0.14 | 0.20 | 0.21 | 0.21 |
| Hebei | 0.01 | 0.03 | 0.01 | 0.03 | 0.09 | 0.06 | 0.07 | 0.08 | 0.07 | 0.10 | 0.15 | 0.15 | 0.16 | 0.19 | 0.18 | 0.18 | 0.22 |
| Tianjin | 0.00 | 0.03 | 0.05 | 0.08 | 0.09 | 0.12 | 0.18 | 0.19 | 0.20 | 0.17 | 0.22 | 0.24 | 0.20 | 0.17 | 0.30 | 0.31 | 0.20 |
| Beijing | 0.01 | 0.05 | 0.03 | 0.06 | 0.04 | 0.11 | 0.14 | 0.11 | 0.17 | 0.18 | 0.21 | 0.22 | 0.15 | 0.13 | 0.31 | 0.37 | 0.14 |
| Shanxi | 0.01 | 0.11 | 0.10 | 0.18 | 0.17 | 0.19 | 0.20 | 0.20 | 0.17 | 0.23 | 0.20 | 0.20 | 0.27 | 0.26 | 0.35 | 0.38 | 0.32 |
| Henan | 0.20 | 0.62 | 0.53 | 1.81 | 1.96 | 1.84 | 1.54 | 1.44 | 1.71 | 1.19 | 1.29 | 1.30 | 1.28 | 1.27 | 1.46 | 1.29 | 1.34 |
| Anhui | 0.00 | 0.08 | 0.08 | 0.18 | 0.26 | 0.19 | 0.24 | 0.31 | 0.34 | 0.31 | 0.34 | 0.27 | 0.39 | 0.43 | 0.44 | 0.49 | 0.45 |
| Hubei | 0.16 | 0.13 | 0.15 | 0.25 | 0.36 | 0.36 | 0.35 | 0.41 | 0.44 | 0.47 | 0.48 | 0.56 | 0.60 | 0.63 | 0.69 | 0.72 | 0.74 |
| Hunan | 0.07 | 0.08 | 0.10 | 0.20 | 0.36 | 0.48 | 0.61 | 0.68 | 0.80 | 0.84 | 1.09 | 0.87 | 1.17 | 1.36 | 1.60 | 1.72 | 1.43 |
| Jiangxi | 0.06 | 0.10 | 0.09 | 0.16 | 0.22 | 0.23 | 0.26 | 0.33 | 0.30 | 0.38 | 0.43 | 0.68 | 0.86 | 0.81 | 0.89 | 1.02 | 1.26 |

**Supplementary Table 3.** AIDS mortality in 31 provinces of Chinese mainland, 2004–2020(1/105)

| **Model Parameters** | **Residual Squares** | **Sigma** | **AICc** | ***R²*** | **Adjusted R²** | **Spatio-temporal Distance Ratio** | **Trace_of_SMatrix** |
| --- | --- | --- | --- | --- | --- | --- | --- |
| Value | 1298.76 | 2.85 | 862.51 | 0.902 | 0.891 | 0.25 | 34.89 |

**Supplementary Table 4.** Relevant parameters of GTWR model regression
